# Supplementary material for: Advanced oxidation protein products induce pre‐osteoblast apoptosis through a nicotinamide adenine dinucleotide phosphate oxidase‐dependent, mitogen‐activated protein kinases‐mediated intrinsic apoptosis pathway
Source: PubMed Central journal article supplement (PMC6052394; doi:10.1111/acel.12764), 2018-04-16
Supplement: ACEL-17-na-s001.pdf [file ACEL-17-na-s001.pdf]

**Advanced oxidation protein products induce pre-osteoblast apoptosis through a NADPH oxidase-dependent, MAPKs-mediated intrinsic apoptosis pathway**

Si-Yuan Zhu, Jing-Shen Zhuang, Qian-Wu, Zhong-Yuan Liu, Cong-Rui Liao, Shi-Gan Luo, Jian-Ting Chen and Zhao-Ming Zhong

***SUPPORTING INFORMATION***

- Fig. S1** AOPPs induced ROS production detected by Dihydroethidium (DHE).
- Fig. S2** RAGE signaling involved in AOPPs-induced MC3T3-E1 cell apoptosis.
- Fig. S3** AOPPs administration increased the plasma AOPPs level and decreased the plasma B-ALP level.
- Fig. S4** Chronic AOPPs loading activated NADPH oxidase signaling cascade in aged rats.
- Fig. S5** Bone-forming capacity of murine osteoblastic MC3T3-E1 cells.
- Fig. S6** Silencing p47<sup>phox</sup> with lentiviral RNAi vector transfection.

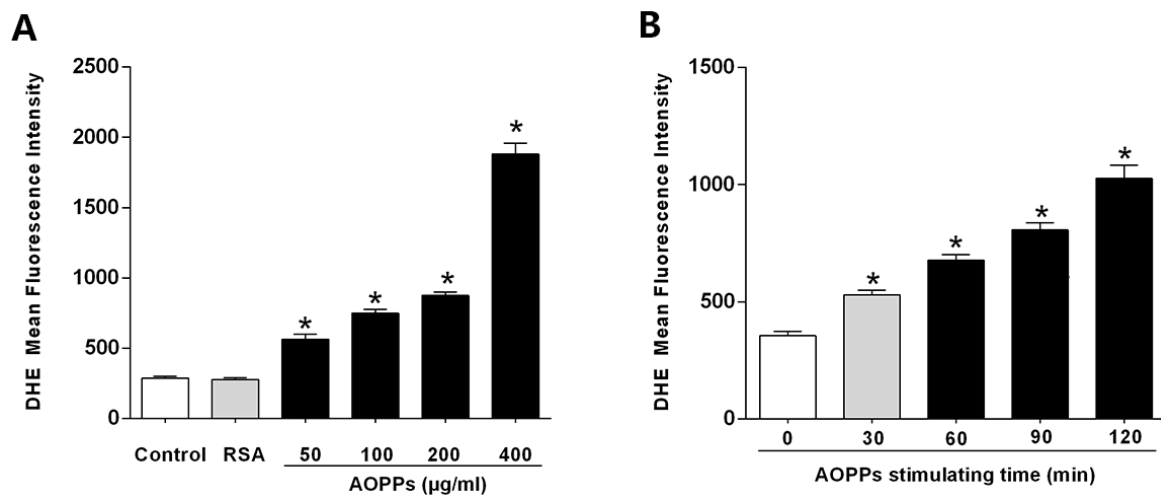

**Fig. S1 AOPPs induced ROS production detected by Dihydroethidium (DHE).** (A) AOPPs (0-400µg/ml, 120min) could induce intracellular ROS production in a concentration- dependent manner. (B) AOPPs (0-120min, 200µg/ml) could induce intracellular ROS production in a time- dependent manner. Data were presented as mean ± SD. \* P<0.05 versus control.

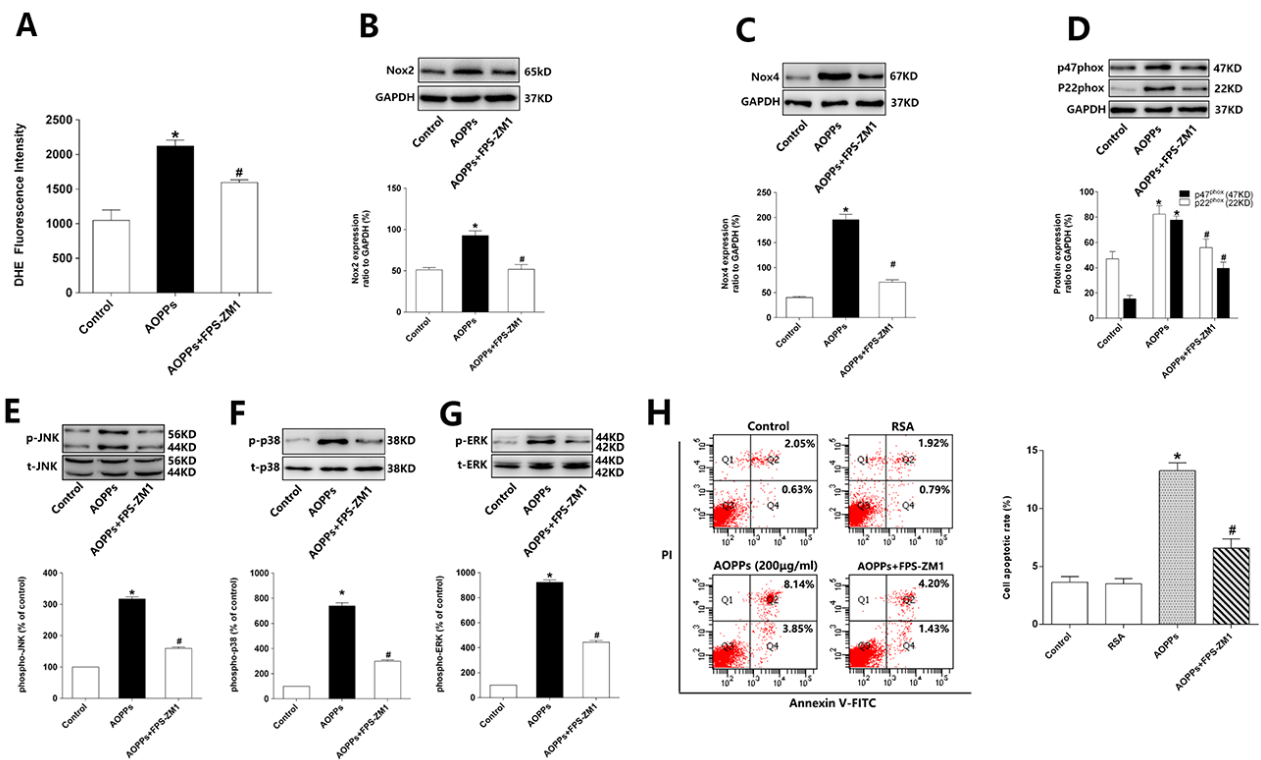

**Fig. S2 RAGE signaling involved in AOPPs-induced MC3T3-E1 cell apoptosis.**

(A) AOPPs-induced (200 $\mu$ g/ml, 120 min) intracellular ROS production was significantly decreased by RAGE specific inhibitor FPS-ZM1. (B-D) AOPPs-induced (200 $\mu$ g/ml, 48h) increased expression of NADPH oxidase subunits (Nox2, Nox4, p47<sup>phox</sup>, p22<sup>phox</sup>) was significantly suppressed by RAGE specific inhibitor FPS-ZM1. (E-G) RAGE specific inhibitor FPS-ZM1 significantly blocked AOPPs-induced (200 $\mu$ g/ml, 180min) phosphorylation of JNK, p38 and ERK1/2. (H) Flow cytometry revealed that AOPPs-induced (200 $\mu$ g/ml, 24h) cell apoptosis could be attenuated by pre-incubation with FPS-ZM1. Cells in the inhibitor group were pre-treated with FPS-ZM1 (5 $\mu$ M) for 40min before AOPPs administration. FPS-ZM1 was present during AOPPs incubation. Data were presented as mean  $\pm$  SD. \* P<0.05 versus control; # P<0.05 versus AOPPs group.

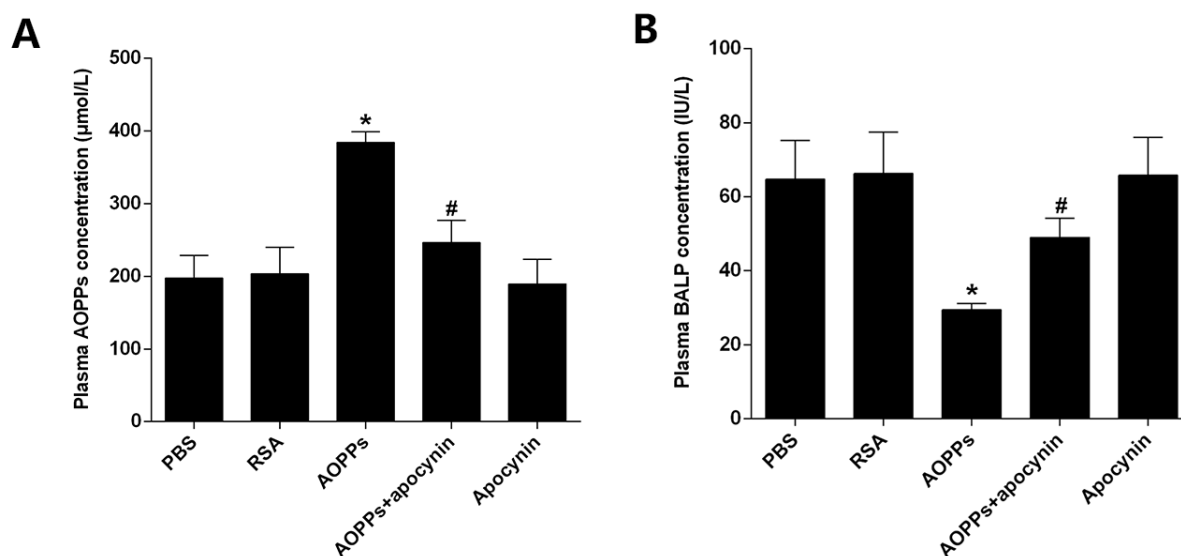

**Fig. S3 AOPPs administration increased the plasma AOPPs level and decreased the plasma B-ALP level.** (A) Intraperitoneal injection of AOPPs significantly increased plasma AOPPs concentration, while apocynin could attenuate the effect. (B) Intraperitoneal injection of AOPPs presented a significant low level of plasma B-ALP concentration, apocynin intervention markedly reduced the influence of AOPPs. Data were presented as mean  $\pm$  SD. \*  $P < 0.05$  versus control; #  $P < 0.05$  versus AOPPs group.

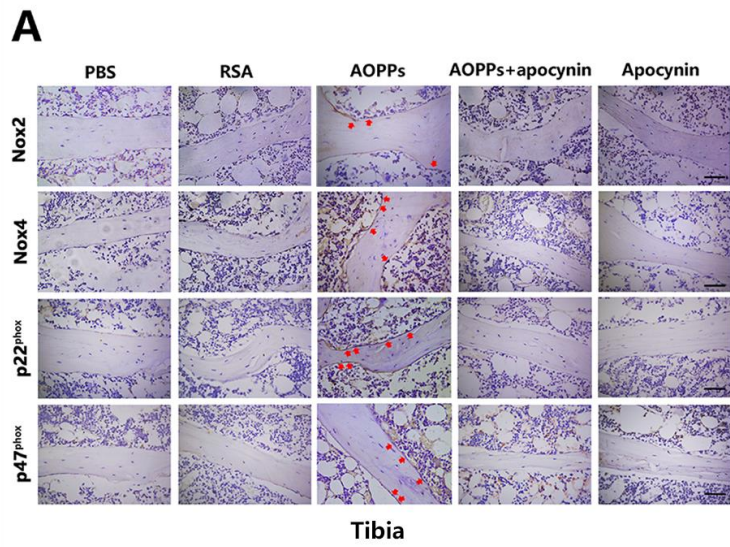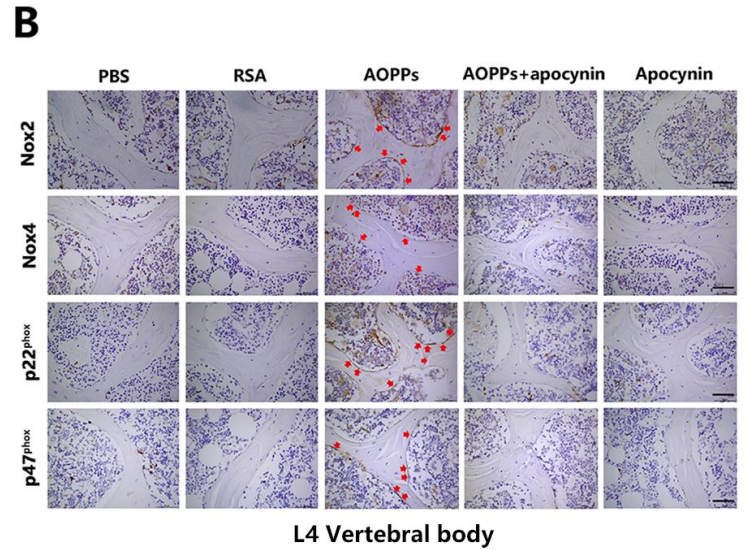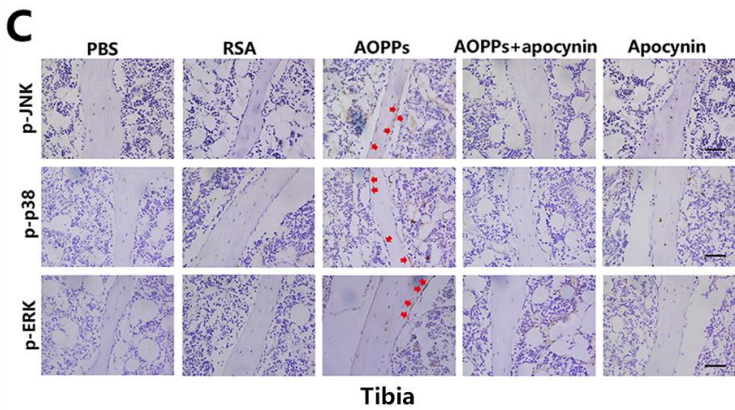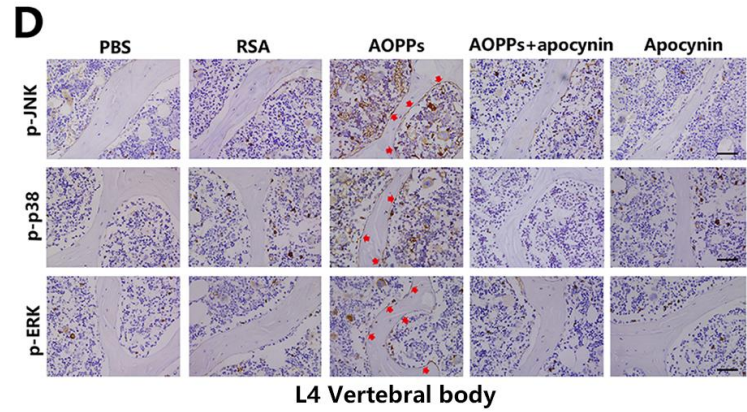

**Fig. S4 Chronic AOPPs loading activated NADPH oxidase signaling cascade in aged rats.** (A-B) Immunohistochemical staining of proximal tibias and L4 vertebral bodies showed that AOPPs administration (50mg/kg) significantly increased Nox2, Nox4, p47<sup>phox</sup>, p22<sup>phox</sup> expression. While apocynin could attenuate this effect (Scale bar=50 $\mu$ m). (C-D) Immunohistochemical staining of proximal tibias and L4 vertebral bodies showed that AOPPs administration (50mg/kg) significantly induced MAPKs family activation (p-JNK, p-p38, p-ERK1/2). While apocynin could attenuate this effect (Scale bar=50 $\mu$ m).

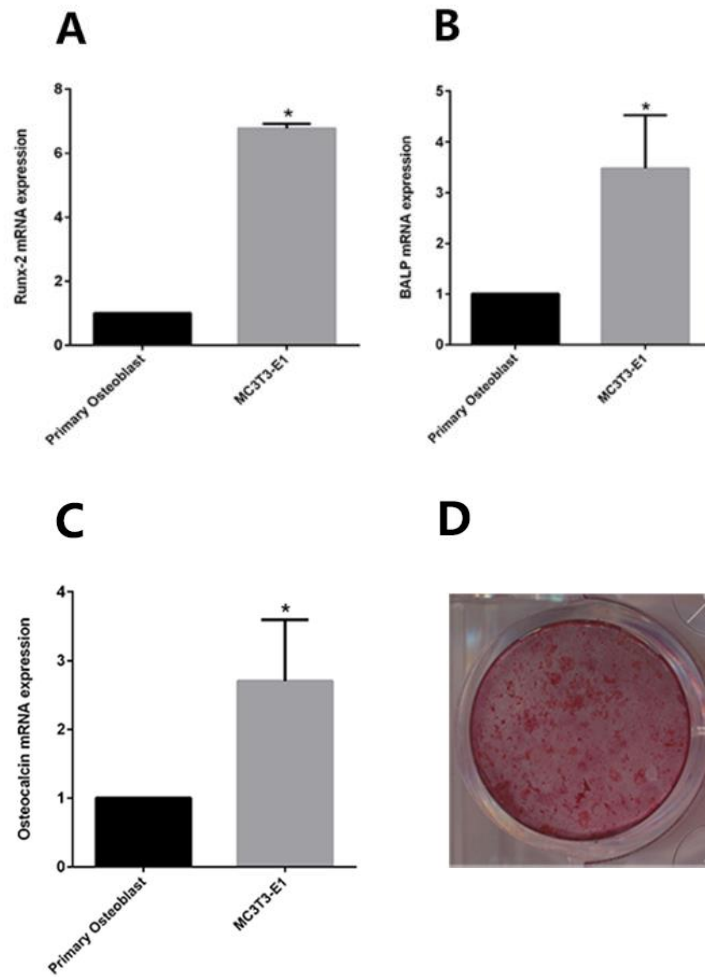

**Fig. S5 Bone-forming capacity of murine osteoblastic MC3T3-E1 cells.** (A-C) Expression of B-ALP, RUNX2 and osteocalcin genes were shown as highly elevated in comparison with primary osteoblasts obtained from the calvarias of neonatal rats. Data were presented as mean  $\pm$  SD. \*  $P < 0.05$  versus primary osteoblasts. (D) MC3T3-E1 cells were stained positive by Alizarin Red S after 3 weeks of osteogenic induction.

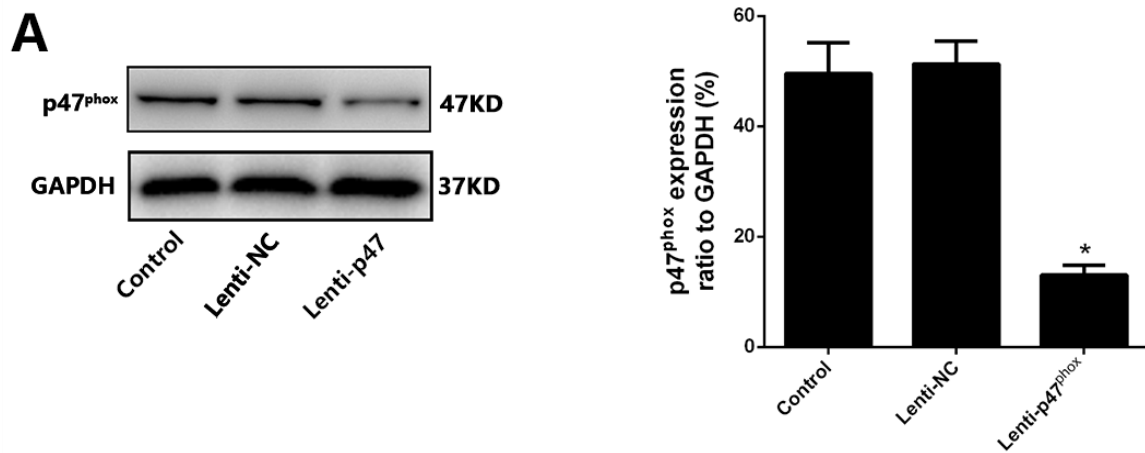

**Fig. S6 Silencing p47<sup>phox</sup> with lentiviral RNAi vector transfection.** (A) MC3T3-E1 cells were transfected with a lentiviral RNAi vector targeting p47<sup>phox</sup> or a lentiviral-negative control vector for 72h. Western blot analysis showed that lentiviral RNAi vector transfection significantly decreased p47<sup>phox</sup> expression in MC3T3-E1 cells. Data were presented as mean  $\pm$  SD. \*  $P < 0.05$  versus control.
